# Supplementary material for: Adenosine deaminase 2 activity negatively correlates with age during childhood
Source: PubMed Central journal article supplement (PMC7350767; doi:10.1186/s12969-020-00446-5), 2020-07-10

### Supplementary Figure 1. Schematic overview of the ADA2 activity assay

One unit of adenosine deaminase (ADA) activity (U/L) was defined as the amount of ADA (inclusive of ADA1 and ADA2) that generates one  $\mu\text{mole}$  of inosine from adenosine per minute at  $37^\circ\text{C}$ . Specific ADA2 activity was taken to be the ADA activity of serum/plasma measured in the presence of  $5\ \mu\text{L}$  of  $1000\ \mu\text{M}$  EHNA, an ADA1 specific inhibitor (final concentration of  $17.54\ \mu\text{M}$  EHNA in the total assay volume of  $285\ \mu\text{L}$ ).

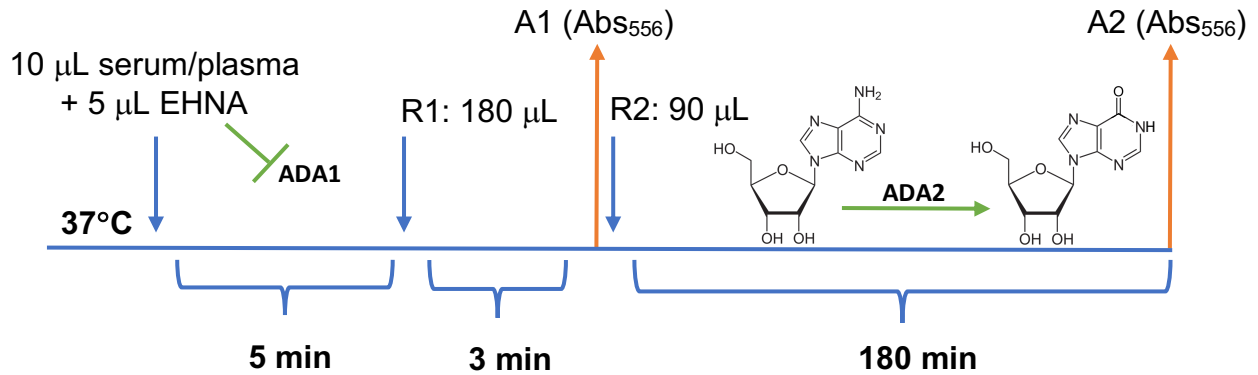

**Supplementary Figure 2. Time optimization of ADA2 Assay** (A) ADA2 activity (y-axis: ADA2 activity (U/L)) in blood sera or plasma obtained from DADA2 patients (x-axis: DADA2, n = 5), healthy children (x-axis: Pediatric Controls, n = 5), and healthy adults (x-axis: Adult Controls, n = 5) calculated after 10 minutes and (B) 3 hours. Horizontal bars show mean ADA2 activity +/- standard deviation (SD). (C) Absorbance (y-axis: Abs<sub>556nm</sub>) measured in serial dilutions of calibrator over 3 hours (x-axis: Time (min)) (D) Change in absorbance (y-axis;  $\Delta$ Abs<sub>556</sub>) of serial dilutions of calibrator (x-axis: Calibrator (U/L), n = 3) after 3 hours. Points show mean change in absorbance +/- SD and trendline shows linear regression of data. \* p < 0.05, \*\* p < 0.01, \*\*\* p < 0.001, \*\*\*\* p < 0.0001.

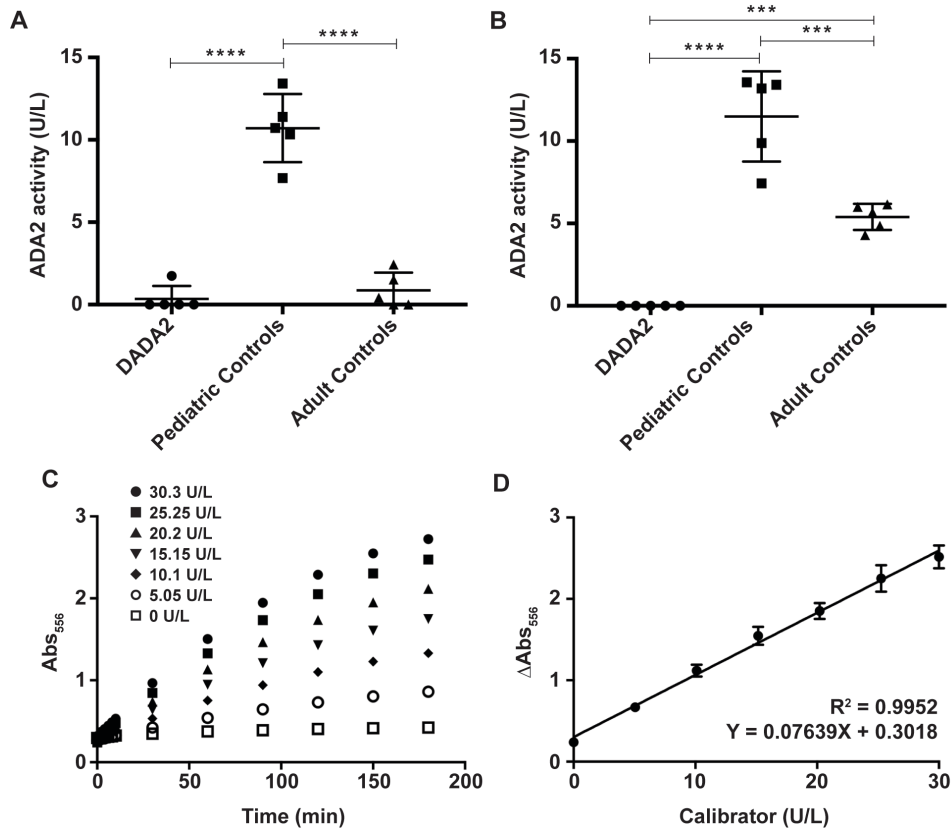

**Supplementary Figure 3. Plasma CRP concentration in the healthy pediatric cohort.** C-reactive protein (y-axis: CRP  $\mu\text{g/ml}$ ) quantitated by ELISA in plasma (diluted 1:2000) from otherwise healthy children ages 5 months – 18 yrs (x-axis, n = 94). Dotted line denotes upper limit of normal CRP concentration in healthy children (5  $\mu\text{g/mL}$ ).

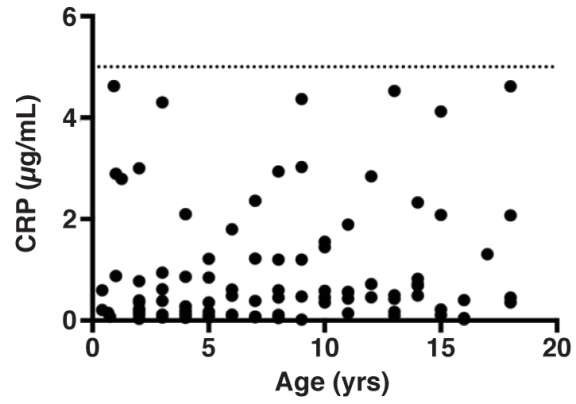

Supplement: 12969_2020_446_MOESM1_ESM.pdf [file 12969_2020_446_MOESM1_ESM.pdf]
